# Supplementary figures and images for: Superantigens Are Critical for Staphylococcus aureus Infective Endocarditis, Sepsis, and Acute Kidney Injury
Source: PubMed Central journal article supplement — mBio. 2013 Aug 20;4(4):e00494-13. doi: 10.1128/mBio.00494-13 (PMC3747586; doi:10.1128/mbio.00494-13), 2013-08-20

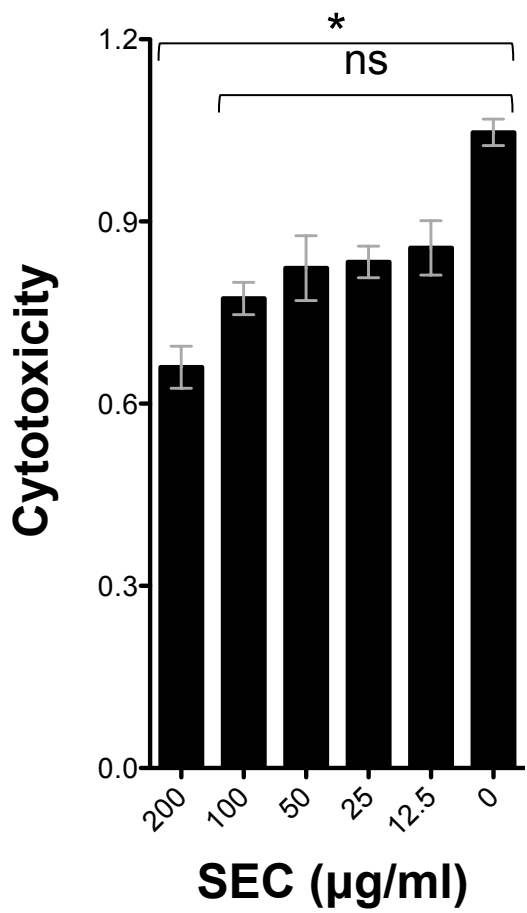

Supplement: mbo004131602sf03.pdf [file mbo004131602sf03.pdf]
